# Supplementary material for: Self-supporting 3D hierarchically porous CuNi–S cathodes with a dual-phase structure for rechargeable Al battery
Source: Royal Society of Chemistry journal article supplement (doi:10.1039/d1se01469b), 2021-01-01
Supplement: d1se01469b1.pdf [file d1se01469b1.pdf]

## Supplementary Material

### **Self-supporting 3D hierarchically porous CuNi-S cathodes with dual-phase structure for rechargeable Al battery**

*Aijing Lv<sup>a</sup>, Songle Lu<sup>a</sup>, Wenjing Yan<sup>a</sup>, Wentao Hu<sup>c,\*</sup>, Mingyong Wang<sup>a,b,\*</sup>*

<sup>a</sup>State Key Laboratory of Advanced Metallurgy, University of Science and  
Technology Beijing, Beijing 100083, P R China

<sup>b</sup>Beijing Key Laboratory of Green Recovery and Extraction of Rare and Precious  
Metals, University of Science and Technology Beijing, Beijing 100083, China

<sup>c</sup>School of Civil and Resource Engineering, University of Science and Technology  
Beijing, 100083 Beijing, P. R. China.

Corresponding author. Tel & Fax: 86-010-82376882, E-mail: [wthu010@ustb.edu.cn](mailto:wthu010@ustb.edu.cn)

(W T Hu), [mywang@ustb.edu.cn](mailto:mywang@ustb.edu.cn) (M Y Wang)

## Table of Contents

|                |    |
|----------------|----|
| Table S1 ..... | 3  |
| Table S2 ..... | 4  |
| Fig. S1 .....  | 5  |
| Fig. S2 .....  | 6  |
| Fig. S3 .....  | 7  |
| Fig. S4 .....  | 8  |
| Fig. S5 .....  | 9  |
| Fig. S6 .....  | 10 |
| Table S3 ..... | 11 |
| Fig. S7 .....  | 12 |
| Fig. S8 .....  | 13 |
| Tabel S4 ..... | 14 |
| Fig. S9 .....  | 15 |
| Fig. S10 ..... | 16 |
| Table S5 ..... | 17 |

**Table S1.** Electrolyte compositions for metal electrodeposition based on different Cu/Ni ratio.

| Cu/Ni ratio | Electrolyte compositions |                       |                                                     |                                    |          |
|-------------|--------------------------|-----------------------|-----------------------------------------------------|------------------------------------|----------|
|             | CuSO <sub>4</sub> (M)    | NiSO <sub>4</sub> (M) | (NH <sub>4</sub> ) <sub>2</sub> SO <sub>4</sub> (M) | H <sub>2</sub> SO <sub>4</sub> (M) | SDS (mM) |
| 1:0         | 0.1                      | --                    | 1.0                                                 | 0.7                                | 1.0      |
| 1:1         | 0.1                      | 0.1                   | 1.0                                                 | 0.7                                | 1.0      |
| 1:2         | 0.1                      | 0.2                   | 1.0                                                 | 0.7                                | 1.0      |
| 0:1         | --                       | 0.1                   | 1.0                                                 | 0.7                                | 1.0      |

**Table S2.** Cathodes names for the self-supporting cathodes based on different Cu/Ni ratio.

| Cu/Ni ratio | Cathodes name            |                          |                            |
|-------------|--------------------------|--------------------------|----------------------------|
|             | Electrodeposited Samples | Oxidation Samples        | Sulfur Replacement Samples |
| 1:0         | Cu/CC                    | Cu-O/CC                  | Cu-S/CC                    |
| 1:1         | CuNi/CC <sub>1.0</sub>   | CuNi-O/CC <sub>1.0</sub> | CuNi-S/CC <sub>1.0</sub>   |
| 1:2         | CuNi/CC <sub>2.0</sub>   | CuNi-O/CC <sub>2.0</sub> | CuNi-S/CC <sub>2.0</sub>   |
| 0:1         | Ni/CC                    | Ni-O/CC                  | Ni-S/CC                    |

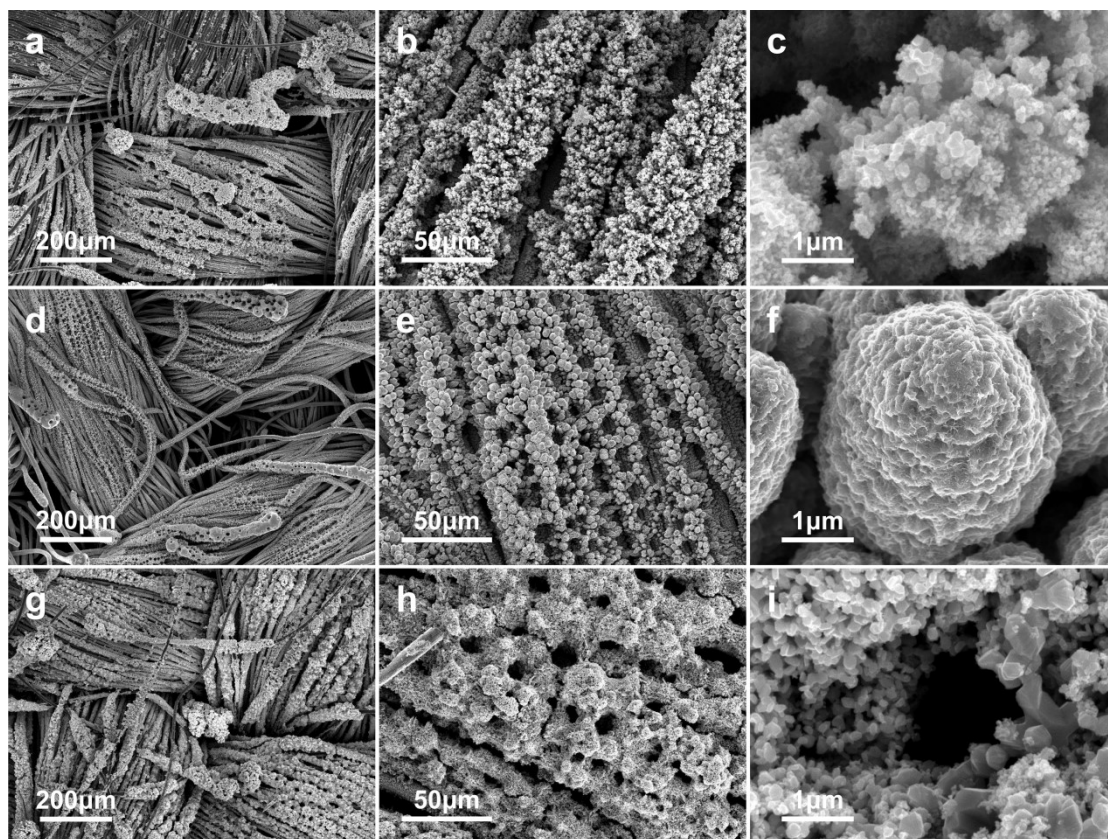

**Fig. S1** SEM images of (a-c) Cu-S/CC, (d-f) Ni-S/CC and (g-i) CuNi-S/CC<sub>2.0</sub>.

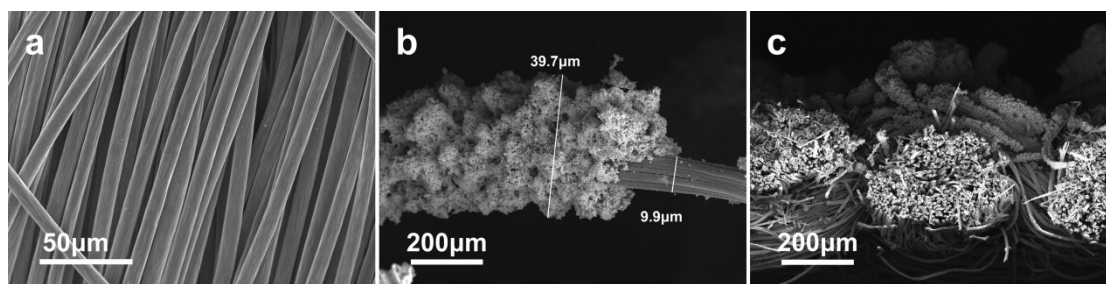

**Fig. S2** SEM images of (a) carbon cloth (CC) fibers and (b) carbon fibers covered by CuNi-S<sub>1.0</sub>. (c) Top-view SEM image of CuNi-S/CC<sub>1.0</sub>.

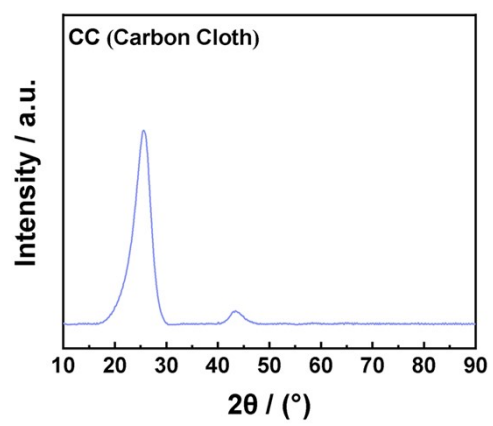

**Fig. S3** XRD pattern of carbon cloth (CC) fibers.

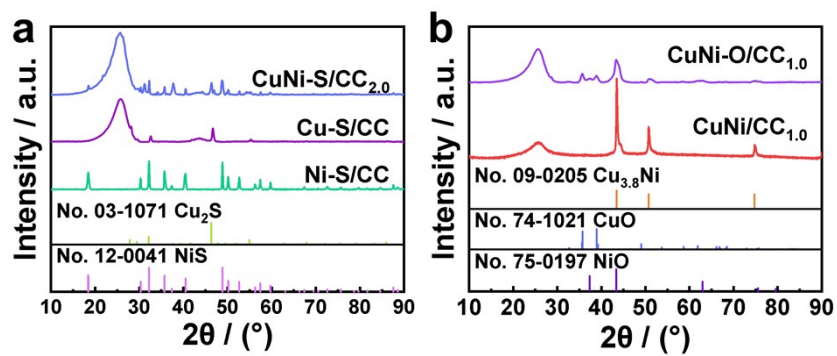

**Fig. S4** (a) XRD patterns of Ni-S/CC, Cu-S/CC and CuNi-S/CC<sub>2.0</sub>. (b) XRD patterns of CuNi/CC<sub>1.0</sub> and CuNi-O/CC<sub>1.0</sub>.



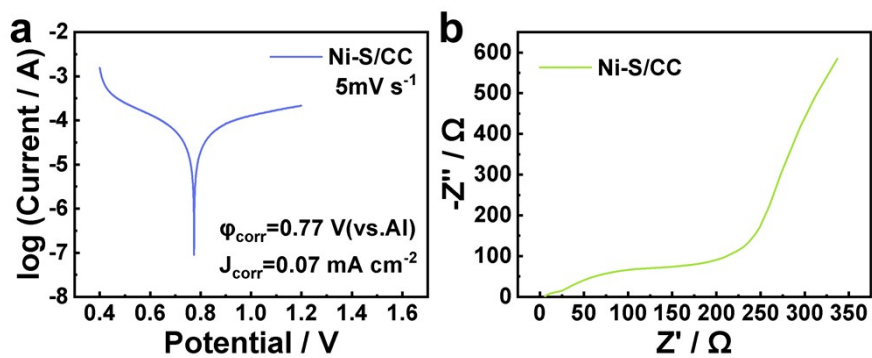

**Fig. S5** Corrosion resistance and electrical conductivity of self-supporting Ni-S/CC cathode based on  $\text{AlCl}_3/[\text{EMIm}]\text{Cl}$  ionic liquids. (a) Tafel curves and electrochemical corrosion parameters of Ni-S/CC. (b) Nyquist plots of Ni-S/CC cathode before cycling.

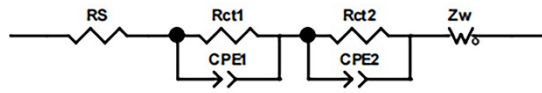

**Fig. S6** Equivalent circuit for EIS of Cu-S/CC, Ni-S/CC, CuNi-S/CC<sub>1.0</sub>, CuNi-S/CC<sub>2.0</sub>, CuNi-O/CC<sub>1.0</sub> and CuNi/CC<sub>1.0</sub> cathodes.

Where  $R_s$  is the solution resistance;  $R_{ct1}$  and  $CPE_1$  are the micro-pore resistance and constant phase element of various self-supporting cathodes;  $R_{ct2}$  and  $CPE_2$  are the charge-transfer resistance and constant phase element of various self-supporting cathodes;  $Z_w$  is associated with the Warburg impedance.

**Table S3.** EIS parameters and diffusion coefficients obtained by fitting the impedance spectra of CuNi/CC<sub>1.0</sub>, CuNi-O/CC<sub>1.0</sub>, CuNi-S/CC<sub>1.0</sub>, CuNi-S/CC<sub>2.0</sub>, Cu-S/CC and Ni-S/CC cathodes

| Parameter                                                            | CuNi/CC <sub>1.0</sub>   | CuNi-O/CC <sub>1.0</sub> | CuNi-S/CC <sub>1.0</sub> | CuNi-S/CC <sub>2.0</sub> | Cu-S/CC                  | Ni-S/CC                  |
|----------------------------------------------------------------------|--------------------------|--------------------------|--------------------------|--------------------------|--------------------------|--------------------------|
| R <sub>s</sub> / Ω cm <sup>2</sup>                                   | 4.33                     | 5.50                     | 4.25                     | 5.09                     | 5.05                     | 4.96                     |
| R <sub>ct1</sub> / Ω cm <sup>2</sup>                                 | 6.84                     | 6.52                     | 4.24                     | 2.64                     | 5.90                     | 11.30                    |
| CPE <sub>1-T</sub> / Ω <sup>-1</sup> s <sup>n</sup> cm <sup>-2</sup> | 9.95 × 10 <sup>-5</sup>  | 2.80 × 10 <sup>-5</sup>  | 1.96 × 10 <sup>-5</sup>  | 7.96 × 10 <sup>-5</sup>  | 3.79 × 10 <sup>-4</sup>  | 1.90 × 10 <sup>-5</sup>  |
| CPE <sub>1-P</sub>                                                   | 0.66                     | 0.77                     | 0.77                     | 0.73                     | 0.59                     | 0.92                     |
| R <sub>ct2</sub> / Ω cm <sup>2</sup>                                 | 73.98                    | 409.90                   | 126.50                   | 108.90                   | 225.50                   | 88.06                    |
| CPE <sub>2-T</sub> / Ω <sup>-1</sup> s <sup>n</sup> cm <sup>-2</sup> | 2.89 × 10 <sup>-4</sup>  | 1.16 × 10 <sup>-3</sup>  | 1.35 × 10 <sup>-3</sup>  | 1.21 × 10 <sup>-3</sup>  | 4.89 × 10 <sup>-4</sup>  | 2.18 × 10 <sup>-4</sup>  |
| CPE <sub>2-P</sub>                                                   | 0.79                     | 0.64                     | 0.69                     | 0.74                     | 0.71                     | 0.86                     |
| Z <sub>w-R</sub> / Ω cm <sup>2</sup>                                 | 919.80                   | 60.97                    | 36.46                    | 29.97                    | 39.64                    | 411.40                   |
| Z <sub>w-T</sub>                                                     | 7.86                     | 0.37                     | 0.43                     | 0.47                     | 0.15                     | 1.09                     |
| Z <sub>w-P</sub>                                                     | 0.56                     | 0.39                     | 0.43                     | 0.37                     | 0.34                     | 0.47                     |
| σ                                                                    | 92.57                    | 61.67                    | 20.86                    | 16.90                    | 46.51                    | 118.00                   |
| DC <sup>a)</sup> / cm <sup>2</sup> s <sup>-1</sup>                   | 9.49 × 10 <sup>-16</sup> | 2.14 × 10 <sup>-15</sup> | 1.87 × 10 <sup>-14</sup> | 2.85 × 10 <sup>-14</sup> | 3.76 × 10 <sup>-15</sup> | 5.84 × 10 <sup>-16</sup> |

<sup>a)</sup> The diffusion coefficient (DC) is calculated as follow:

$$DC = \frac{1}{2} \left[ \frac{RT}{F^2 n^2 AC \sigma} \right]^2 \quad (S1)$$

$$Z_{re} = K + \sigma \omega^{-1/2} \quad (S2)$$

Where R is the gas constant(8.314 J K<sup>-1</sup> mol<sup>-1</sup>); T is the absolute temperature (298 K); F is the Faraday constant (96485 C mol<sup>-1</sup>); n is the electron transfer number; A is the active surface area of the cathode (1 cm<sup>2</sup>); C is the concentration of Al ions in the cathode electrode (~1.65 × 10<sup>-2</sup> mol cm<sup>-3</sup>); σ is the Warburg coefficient, determined by the slope of the real resistance Z<sub>re</sub> vs. ω<sup>-1/2</sup> in low frequency region (ω=2πf).

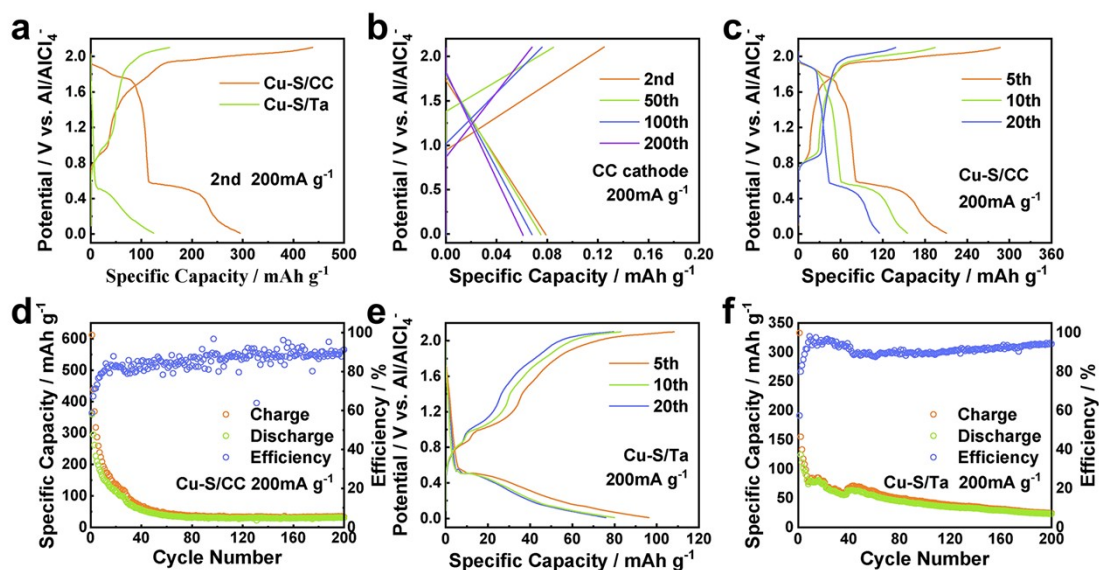

**Fig. S7** (a) Charge/discharge curves of Cu-S/CC and powdery Cu-S/Ta cathode of 2nd cycle at the current densities of  $200 \text{ mA g}^{-1}$ . (b) Charge/discharge curves of 2nd, 5th, 10th, 20th cycles of CC cathode at a current density of  $200 \text{ mA g}^{-1}$ . Charge/discharge curves of 5th, 10th, 20th cycles of (c) Cu-S/CC, (e) powdery Cu-S/Ta cathode at a current density of  $200 \text{ mA g}^{-1}$ . Cycling performance and coulombic efficiency of (d) Cu-S/CC and (f) powdery Cu-S/Ta at a current density of  $200 \text{ mA g}^{-1}$ .

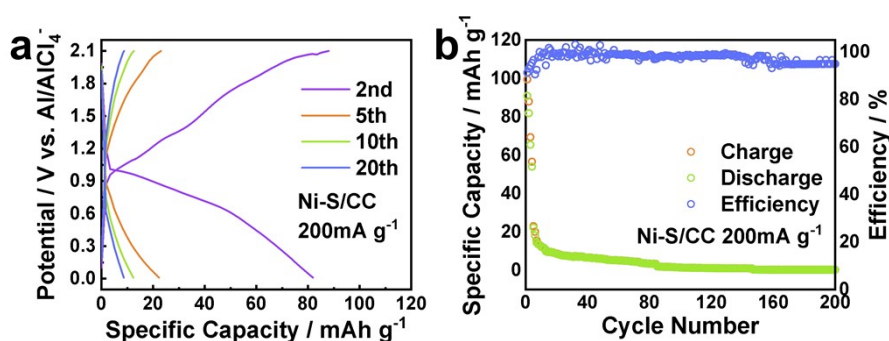

**Fig. S8** (a) Charge/discharge curves of Ni-S/CC cathode for 2nd, 5th, 10th, 20th cycles at a current density of  $200 \text{ mA g}^{-1}$ . (b) Cycling performance and coulombic efficiency of Ni-S/CC at a current density of  $200 \text{ mA g}^{-1}$ .

**Table S4.** Comparison of loading mass and electrochemical performance of various self-supporting cathodes prepared in this paper for Al battery cathodes

| <b>Material</b>          | <b>Loading mass /<br/>mg cm<sup>-2</sup></b> | <b>Cycle number</b> | <b>Initial capacity /<br/>mA h g<sup>-1</sup></b> | <b>Last capacity /<br/>mA h g<sup>-1</sup></b> | <b>Current Density /<br/>mA g<sup>-1</sup></b> | <b>Coulombic Efficiency /<br/>%</b> |
|--------------------------|----------------------------------------------|---------------------|---------------------------------------------------|------------------------------------------------|------------------------------------------------|-------------------------------------|
| CuNi/CC <sub>1.0</sub>   | 5.3                                          | --                  | --                                                | --                                             | --                                             | --                                  |
| CuNi-O/CC <sub>1.0</sub> | 5.2                                          | 200                 | 26.00                                             | 8.2                                            | 200                                            | 98.4                                |
| CuNi-S/CC <sub>1.0</sub> | 4.2                                          | 200                 | 333.5                                             | 70.5                                           | 200                                            | 99.4                                |
| CuNi-S/CC <sub>2.0</sub> | 4.8                                          | 200                 | 398.1                                             | 54.3                                           | 200                                            | 100.9                               |
| Cu-S/CC                  | 2.2                                          | 200                 | 294.8                                             | 30.0                                           | 200                                            | 91.3                                |
| Ni-S/CC                  | 5.3                                          | 200                 | 81.88                                             | 0.32                                           | 200                                            | 95.0                                |
| Cu-S/Ta                  | 0.6                                          | 200                 | 124.2                                             | 23.0                                           | 200                                            | 94.3                                |

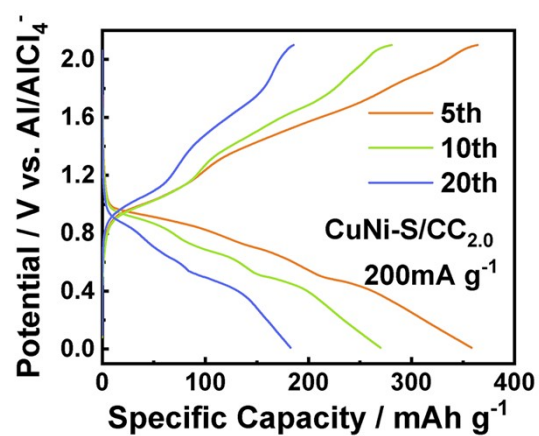

**Fig. S9** Charge/discharge curves of CuNi-S/CC<sub>2.0</sub> cathode for 5th, 10th, 20th cycles at a current density of 200 mA g<sup>-1</sup>.

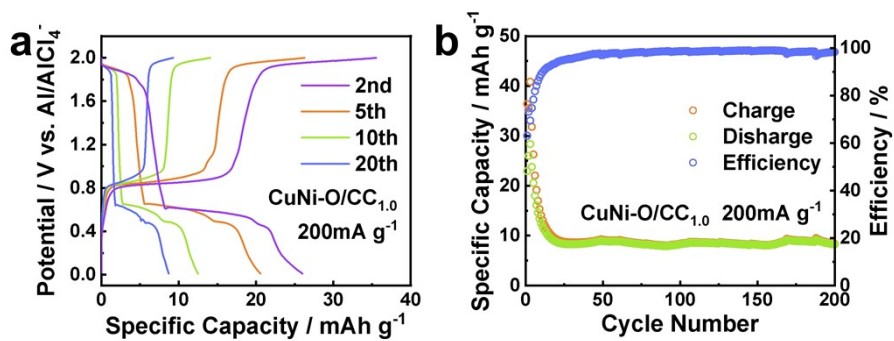

**Fig. S10** (a) Charge/discharge curves of CuNi-O/CC<sub>1.0</sub> cathode for 2nd, 5th, 100th, 200th cycles at a current density of 200 mA g<sup>-1</sup>. (b) Cycling performance and coulombic efficiency of CuNi-O/CC<sub>1.0</sub> at a current density of 200 mA g<sup>-1</sup>.

**Table S5.** Comparison of metal sulfides as cathode materials for Al batteries.

| Active Material                              | Cathode           | Current                      | Cycle  | Initial Capacity       | Last Capacity          | Discharge        | Loading Mass          |
|----------------------------------------------|-------------------|------------------------------|--------|------------------------|------------------------|------------------|-----------------------|
|                                              | Preparation       | Density / mA g <sup>-1</sup> | Number | / mA h g <sup>-1</sup> | / mA h g <sup>-1</sup> | Voltage / V      | / mg cm <sup>-2</sup> |
| Ni <sub>3</sub> S <sub>2</sub> /graphene [9] | AM:PTFE=9:1       | 200                          | 300    | 235                    | 50                     | 1.0              | 0.9-1.35              |
| FeS <sub>2</sub> [10]                        | AM:CF:PTFE=14:5:1 | 8.94                         | 1      | ~600                   | --                     | 0.65             | --                    |
| SnS <sub>2</sub> /graphene [14]              | AM:KB:CMC=8:1:1   | 200                          | 100    | 392                    | 70                     | 0.68             | 1.6                   |
| NiS [17]                                     | not mentioned     | 200                          | 100    | 104.7                  | 104.4                  | 0.9              | --                    |
| CuS/C [19]                                   | AM:AB:PVDF=6:3:1  | 20                           | 100    | 240                    | 90                     | ~1.0             | --                    |
| VS <sub>2</sub> /graphene [20]               | AM:AB:PTFE=6:3:1  | 200                          | 50     | 165                    | 116                    | 0.7              | --                    |
| CoS <sub>2</sub> [21]                        | AM+PVDF           | 100                          | 100    | ~130                   | 60                     | --               | --                    |
| CoS <sub>2</sub> @CNFs [22]                  | AM:CB:PTFE=7:2:1  | 200                          | 500    | --                     | ~80                    | --               | --                    |
| Co <sub>3</sub> S <sub>4</sub> [23]          | AM:KB:PTEE=8:1:1  | 50                           | 150    | 287.9                  | 90                     | ~0.68            | 1.5                   |
| Co <sub>9</sub> S <sub>8</sub> /CNT-CNF [24] | AM+PS             | 100                          | 200    | 315                    | 297                    | 0.95             | 1.5                   |
| WS <sub>2</sub> @NCNFs [25]                  | AM:CB:PVDF=7:2:1  | 100                          | 100    | 314.1                  | 195.8                  | 0.6              | --                    |
| MoS <sub>2</sub> [26]                        | AM:AB:PVDF=6:3:1  | 50                           | 100    | 153.6                  | 112.2                  | --               | --                    |
| MoS <sub>2</sub> /CNFs [27]                  | AM+PAN            | 100                          | 200    | 293.2                  | 126.6                  | 0.55             | ~2.2                  |
| S-NiCo@rGO [29]                              | AM:AB:PVDF=6:3:1  | 1000                         | 100    | 248.2                  | 83                     | 1.6, 0.9         |                       |
| This work-powdery Cu-S/Ta                    | AM:AB:PVDF=6:3:1  | 200                          | 200    | 124.2                  | 23.0                   | 1.60, 0.50       | 0.6                   |
| This work-Cu-S/CC                            | AM+CF             | 200                          | 200    | 294.8                  | 30.0                   | 1.75, 0.55       | 2.2                   |
| This work-CuNi-S/CC <sub>1.0</sub>           | AM+CF             | 200                          | 200    | 333.5                  | 70.5                   | 1.75, 0.85, 0.55 | 4.2                   |



AM: active material; PVDF: polyvinylidene fluoride; PTFE: polytetrafluoroethylene; KB: ketjen black; CMC: carboxymethyl cellulose; CB: carbon black; PS: polystyrene;  
AB: acetylene black; CF: carbon fiber
